# Supplementary material for: Separation of metallothionein isoforms extracted from isoform-specific knockdown cells on two-dimensional micro high-performance liquid chromatography hyphenated with inductively coupled plasma-mass spectrometry
Source: Royal Society of Chemistry journal article supplement (doi:10.1039/b613662c), 2006-10-20
Supplement: esi.doc [file esi.doc]

This journal © The Royal Society of Chemistry 2006

**Electronic Supplementary Information**


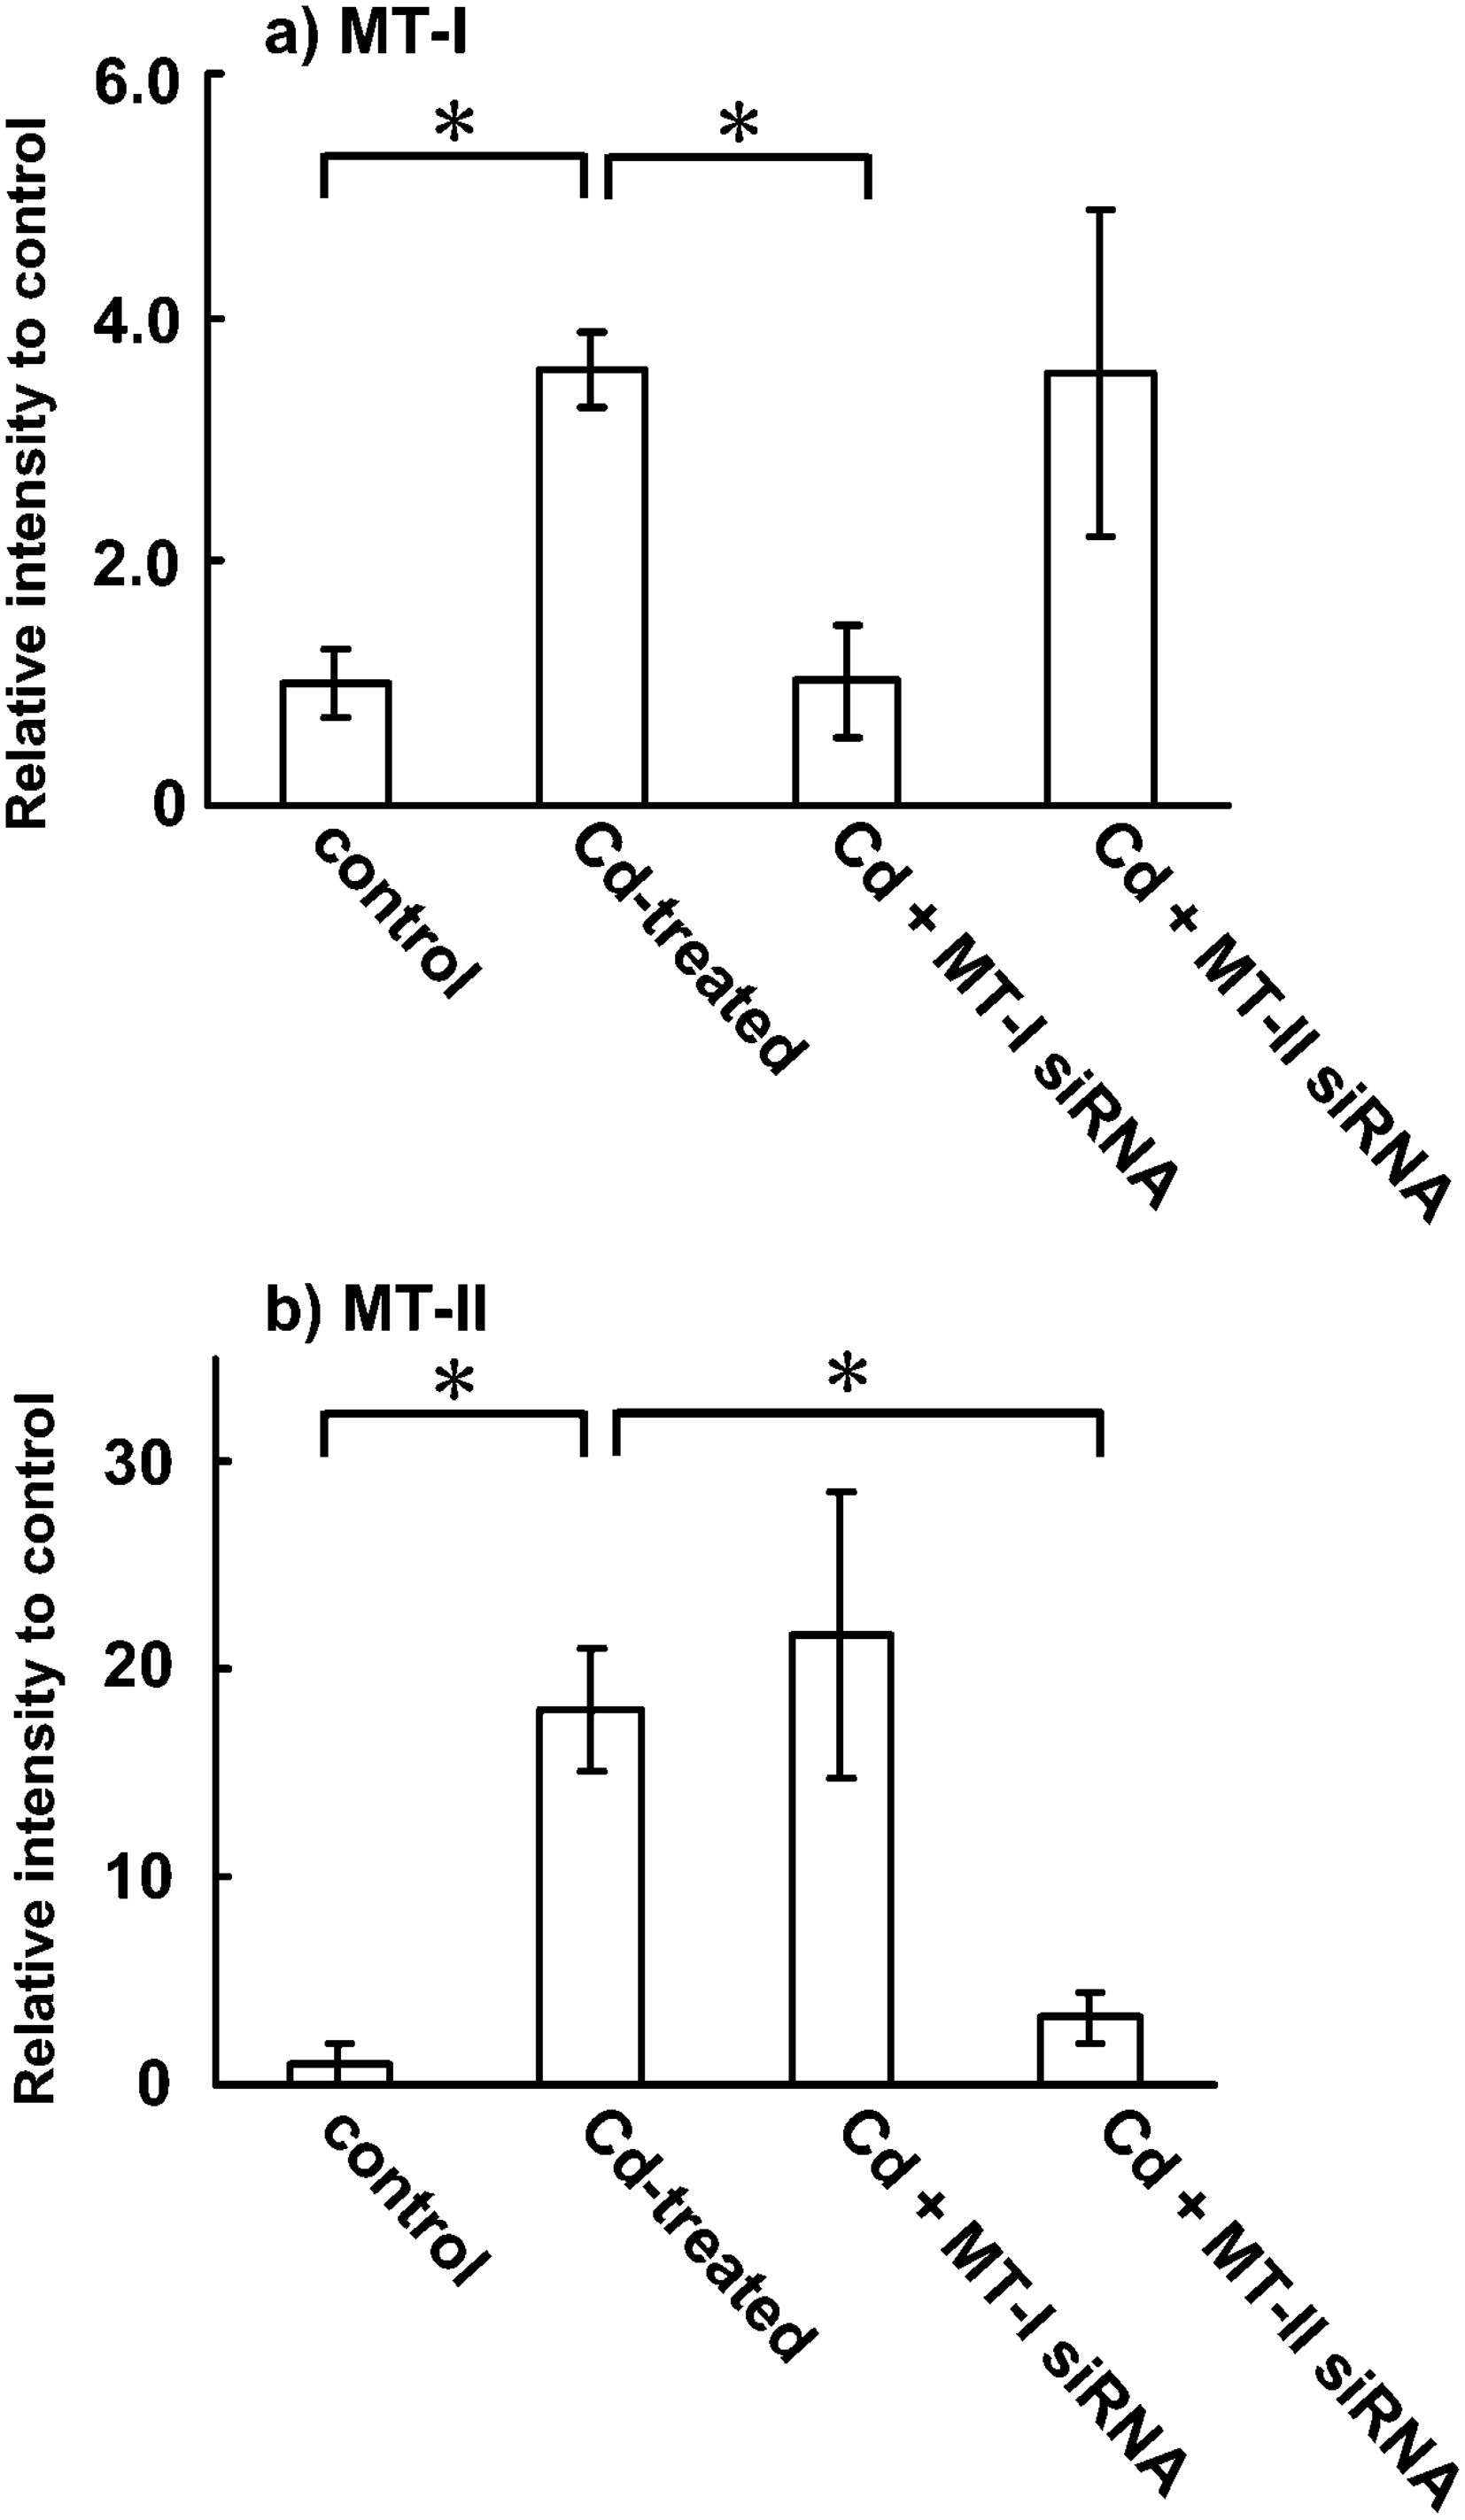


**Fig. S1** Effect of RNAi-mediated isoform-specific silencing on the mRNA expression of MT-I and MT-II. The data are expressed as means ± standard deviation of three independent experiments. The significant difference was calculated by the Student’s *t*-test. The level of significance was set at *p* <0.05.
